# Supplementary material
Source: PubMed Central journal article supplement (PMC7147347)
Supplement: js9b00122_si_001.pdf [file js9b00122_si_001.pdf]

# Native LESA-TWIMS-MSI: spatial, conformational and mass analysis of proteins and protein complexes.

Oliver J. Hale<sup>1</sup>, Emma K. Sisley<sup>1</sup>, Rian L. Griffiths<sup>1#</sup>, Iain B. Styles<sup>2</sup>, Helen J. Cooper<sup>1\*</sup>

1. School of Biosciences, University of Birmingham, Edgbaston B15 2TT, U.K.

2. School of Computer Science, University of Birmingham, Edgbaston B15 2TT, U.K.

#Current address: School of Pharmacy, University of Nottingham, Nottingham NG7 2RD, UK

\*To whom correspondence should be addressed: h.j.cooper@bham.ac.uk

## Supporting Information

| Contents                                                                                 | Page |
|------------------------------------------------------------------------------------------|------|
| File S1: Details of ion image generation and .m files.                                   |      |
| Table S1: Manual quadrupole profile.                                                     | S2   |
| Figure S1: Broad DriftScope selection rule.                                              | S2   |
| Figure S2: Ion images for small proteins detected by LESA-TWIMS-MSI.                     | S3   |
| Figure S3: Ion images for 3 charge states of hemoglobin-related ions.                    | S4   |
| Figure S4: Unfiltered and $t_A$ filtered ion images for ubiquitin [M+5H] <sup>5+</sup> . | S5   |
| Figure S5: ATD for Hb tetramer 16 <sup>+</sup> .                                         | S6   |

**Table S1:** Manual quadrupole profile. Times given are a percentage of each TOF scan (5 s)

| <b>m/z</b>  | <b>Dwell Time (%)</b> | <b>Ramp (%)</b> |
|-------------|-----------------------|-----------------|
| <b>1000</b> | 2                     | 40              |
| <b>3000</b> | 3                     | 55              |
| <b>4500</b> | -                     | -               |

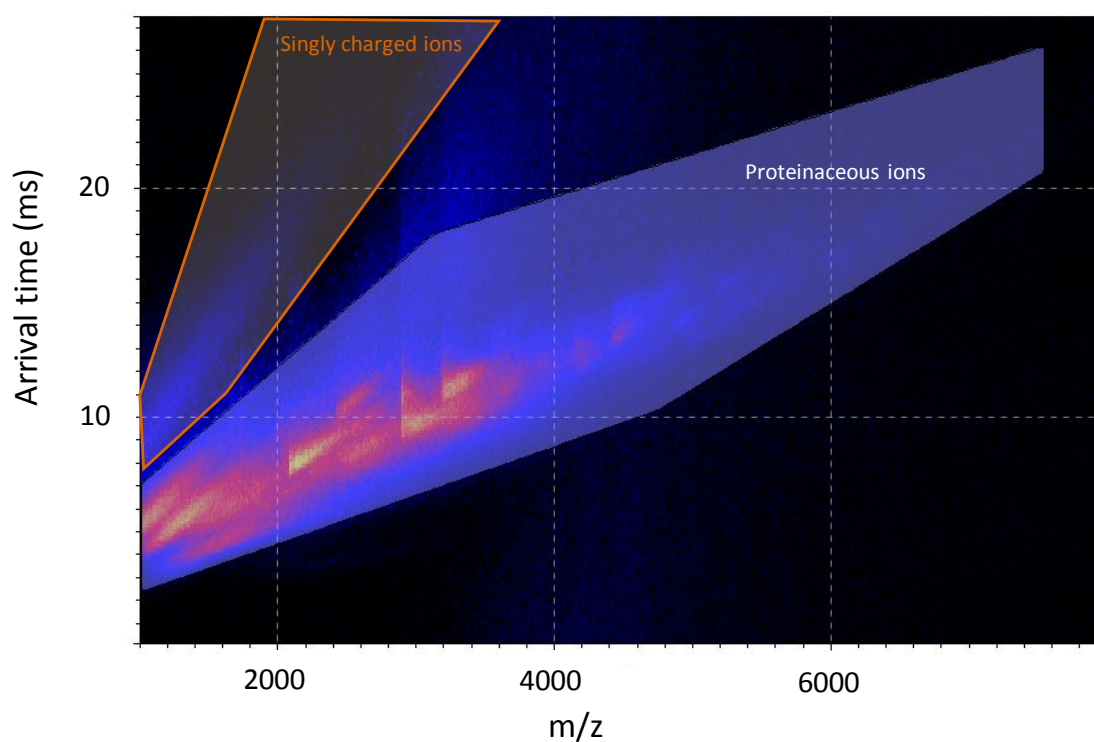

**Figure S1:** 2D heatmap plot of arrival time vs. m/z. Broad filtering arrival time selection rule for broad selection of proteinaceous ions is shown highlighted in blue. Singly-charged ion region is indicated in orange. The selection rule was exported as a text file and imported into in-house software and applied to each data file (pixel) in the imaging dataset.

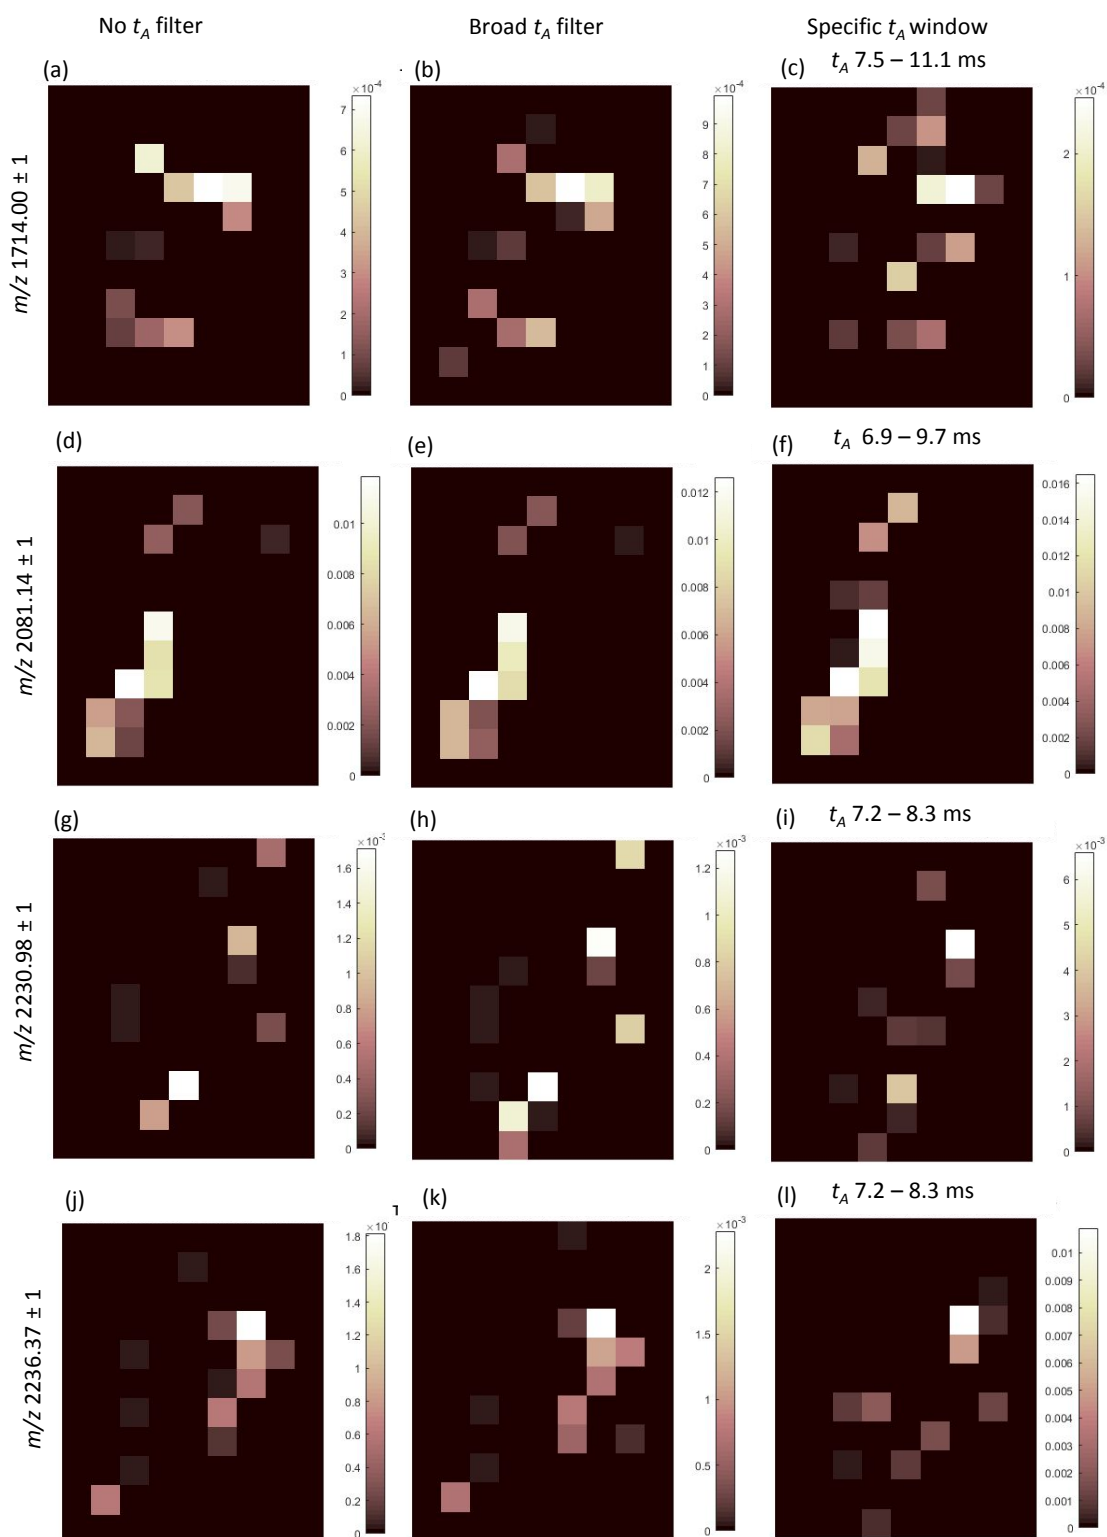

**Figure S2:** Ion images for small proteins detected by LESA-TWIMS-MSI. Ubiquitin (8560 Da,  $m/z$  1714,  $5^+$  charge state) was found to be generally homogeneously distributed, particularly when specific  $t_A$  filtering was performed. The unknown protein with  $m/z$  2081 ( $\sim 14568$  Da,  $7^+$  charge state) was distributed towards the left side of the image, coinciding with location of the large blood vessels. CID MS/MS (not shown) of the protein suggests the presence of heme, i.e., that it is a haemoglobin-related species. The ions with  $m/z$  2230.98 and  $m/z$  2236.37 (unknown mass; charge state unresolvable) featured more intense signals in the renal cortex.

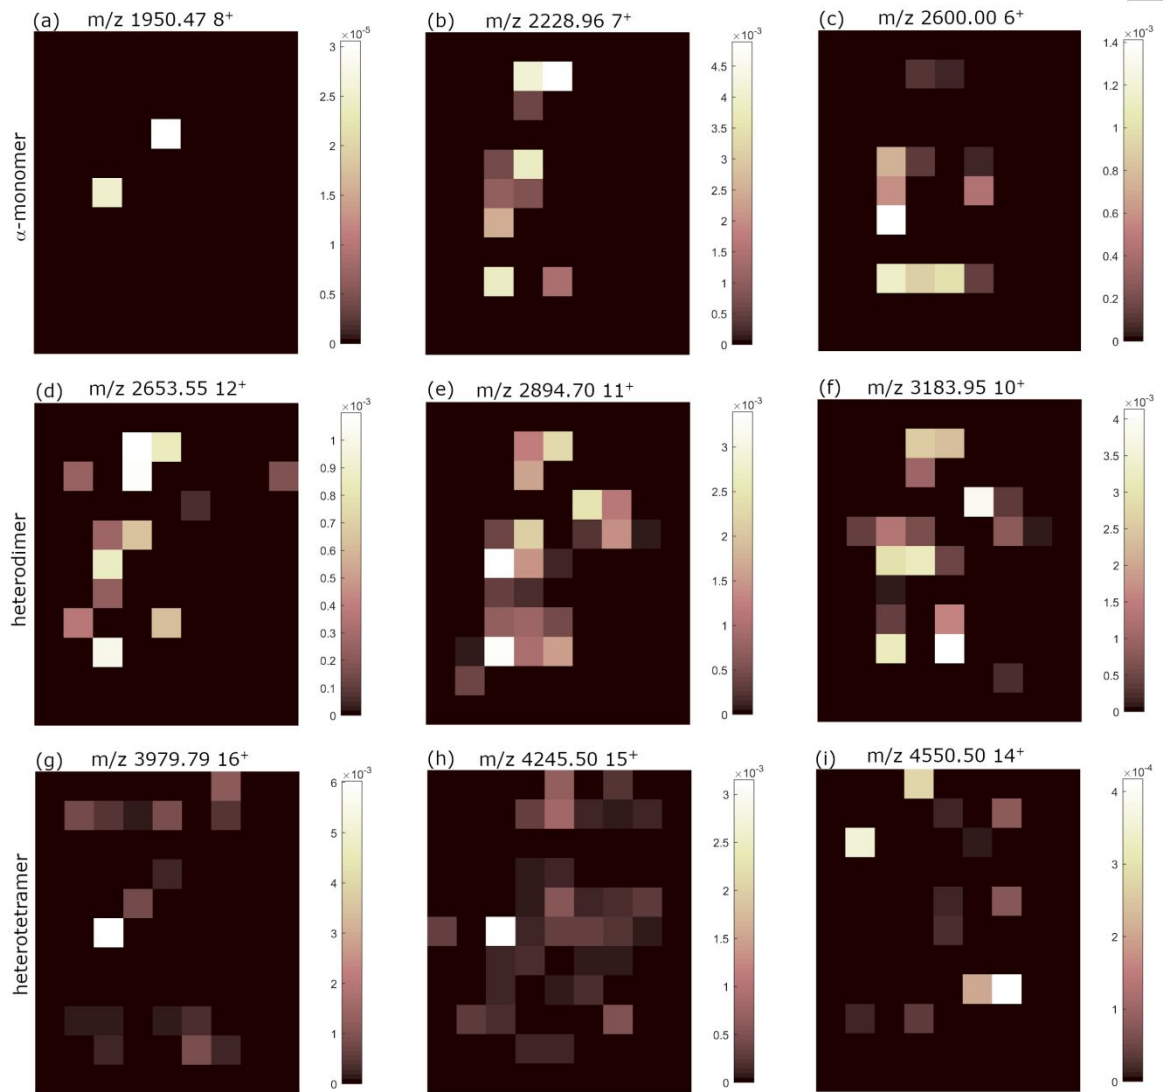

**Figure S3:** Arrival time filtered images for hemoglobin ions. (a-c) heme-bound  $\alpha$ -monomer  $8^+–6^+$ , (d-f) heterodimer  $12^+–10^+$ , (g-i) heterotetramer  $16^+–14^+$ . The middle column represents the image for the most intense charge state.

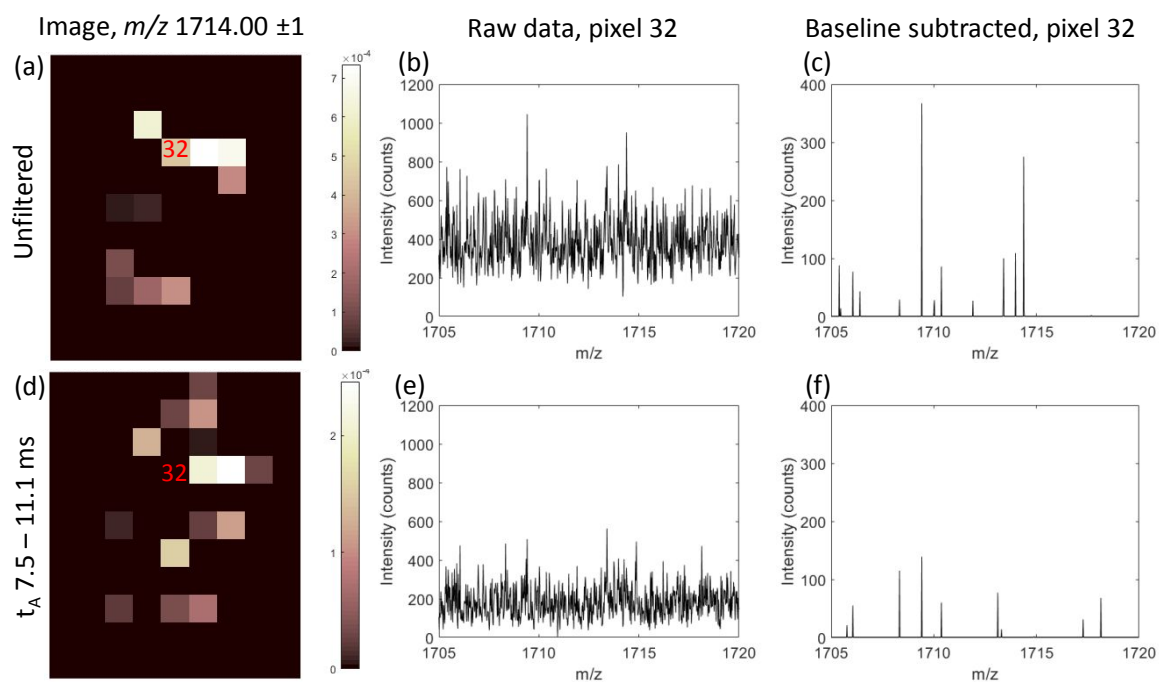

**Figure S4:** Unfiltered and  $t_A$  filtered ion images for ubiquitin  $[M+5H]^{5+}$ . The unfiltered image (a) features an intense signal for the selected  $m/z$  in pixel 32, whereas the arrival time filtered image does not (d). In the raw mass spectra (b, e), peaks for ubiquitin  $[M+5H]^{5+}$  were not present, yet the noise in the unfiltered mass spectrum results in peaks in the baseline-subtracted mass spectrum (c). That was not the case for the  $t_A$  filtered mass spectrum (f).

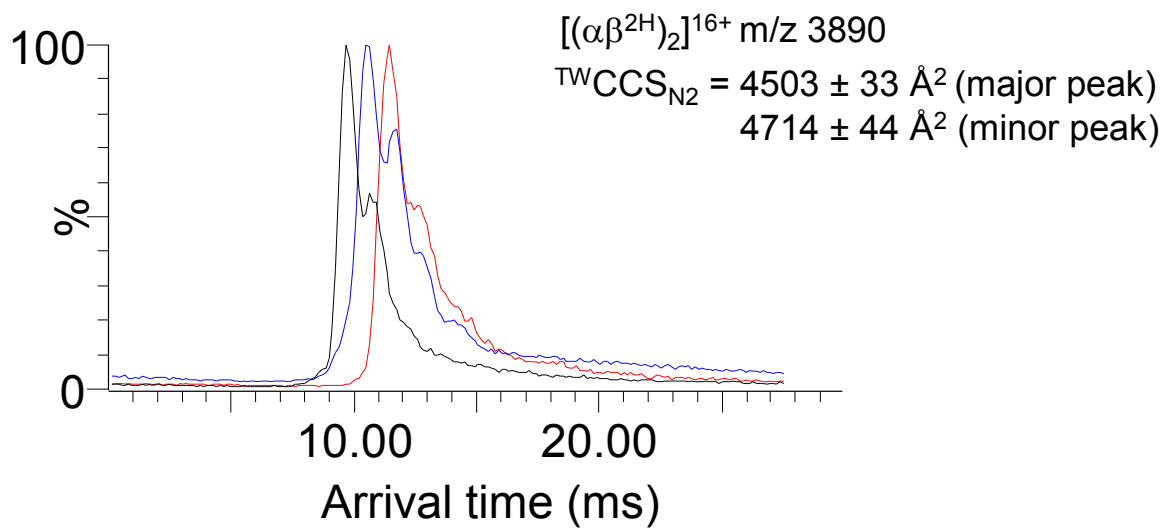

**Figure S5:** Arrival time distribution for  $16^+$  Hb tetramer ions measured at three wave heights, 24 V (red), 25 V (blue) and 26 V (black). A minor peak with a later arrival time was detected, corresponding to a  $200 \text{ \AA}^2$  larger  $^{TW}CCS_{N_2 \rightarrow N_2}$  than for the major peak.
